# Supplementary material for: SK-216, a Novel Inhibitor of Plasminogen Activator Inhibitor-1, Suppresses Lung Metastasis of Human Osteosarcoma
Source: MDPI journal article supplement (doi:10.3390/ijms19030736), 2018-03-05
Supplement: s1 [file s1]

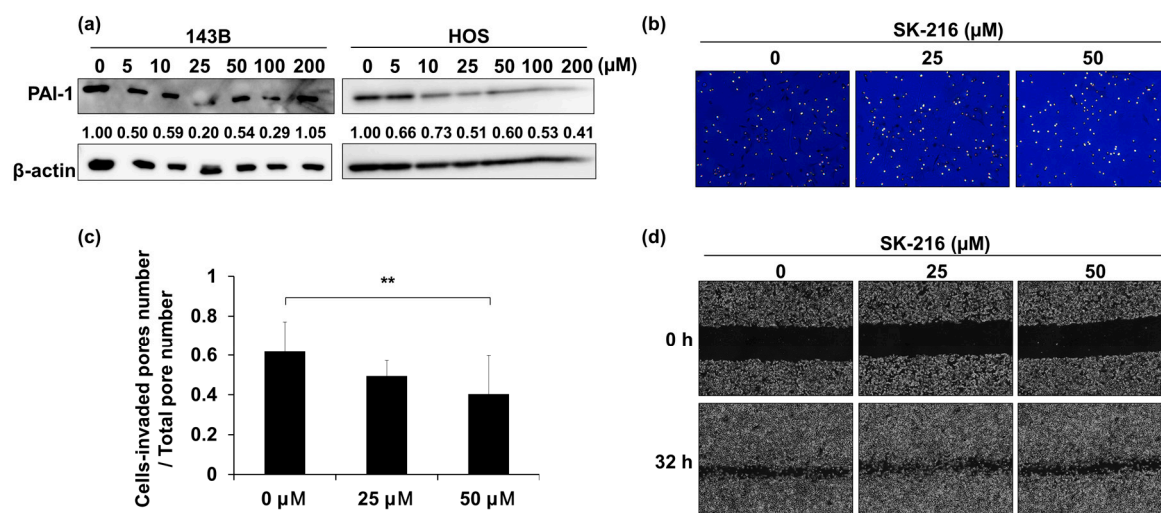

**Supplementary Figure S1.** (a) Western blot analyses of PAI-1 expression in SK-216-treated osteosarcoma cell lines. PAI-1 expression was quantified using Image Studio Lite (LI-COR) and normalized to  $\beta$ -actin. Expression is shown relative to that in non-treated cells (0  $\mu$ M). (b) The representative images of invasion assay of SK-216 treated 143B cells were shown. The hematoxylin-stained cells in pores ascertained through coating pores. (c) Matrigel assay of the invasion of SK-216-treated HOS cells. The ratio of the number of pores containing invading cells to the total number of all pores is shown. Bar graphs show means  $\pm$  SD \*\*P<0.01. (d) The representative images of scratch assay of SK-216 treated 143B cells were shown.

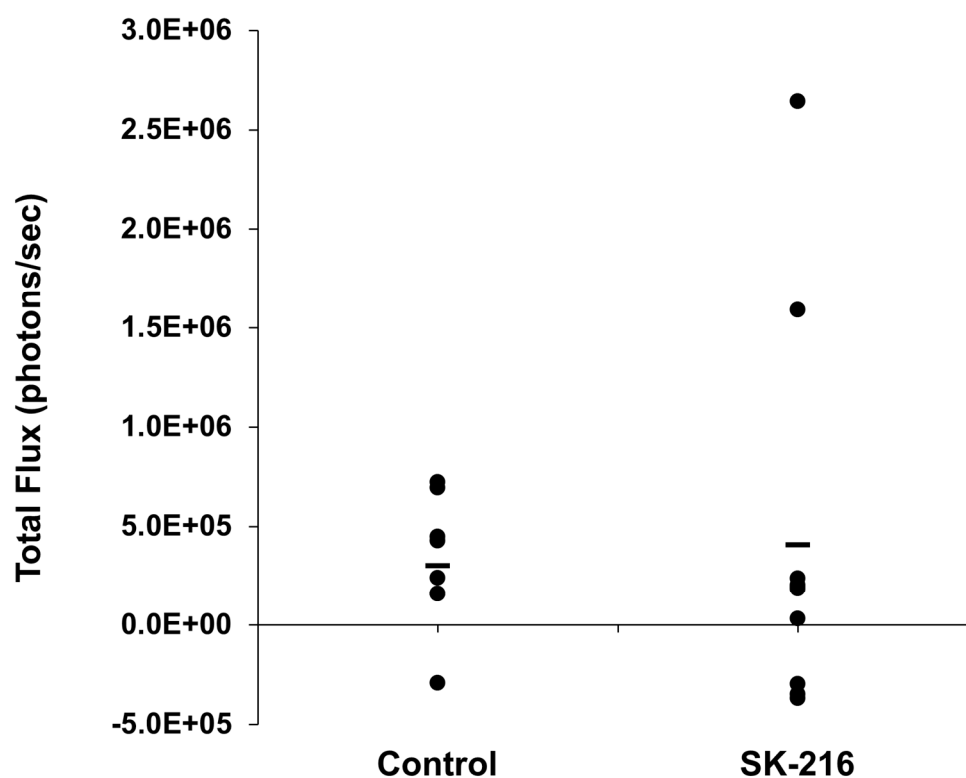

**Supplementary Figure S2.** Total Flux (photons/sec) in the lungs were measured at 5 weeks after cell inoculation. The black bar indicates the mean value.
